# Supplementary material for: Effect of omega-3 fatty acids on TH1/TH2 polarization in individuals with high exposure to particulate matter ≤ 2.5 μm (PM2.5): a randomized, double-blind, placebo-controlled clinical study
Source: PubMed Central journal article supplement (PMC8867632; doi:10.1186/s13063-022-06091-5), 2022-02-24
Supplement: 13063_2022_6091_MOESM1_ESM.pdf [file 13063_2022_6091_MOESM1_ESM.pdf]

# Chengdu Metro Line Map

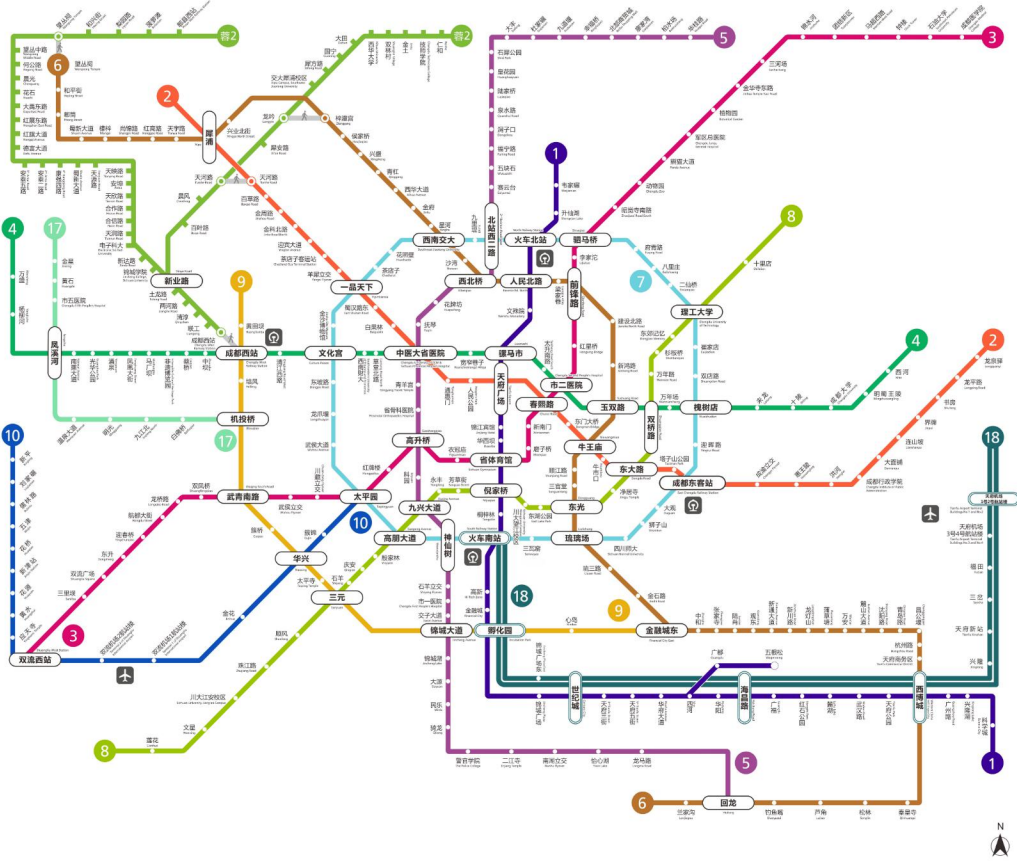

|                    |                        |                                     |                         |                           |                                       |               |               |               |                 |
|--------------------|------------------------|-------------------------------------|-------------------------|---------------------------|---------------------------------------|---------------|---------------|---------------|-----------------|
| 1号线<br>Line 1      | 2号线<br>Line 2          | 3号线<br>Line 3                       | 4号线<br>Line 4           | 5号线<br>Line 5             | 6号线<br>Line 6                         | 7号线<br>Line 7 | 8号线<br>Line 8 | 9号线<br>Line 9 | 10号线<br>Line 10 |
| 17号线<br>Line 17    | 18号线<br>Line 18        | 有轨电车<br>蓉2号线<br>Chengdu Tram Line 2 | 换乘站<br>Transfer station | 快线换乘站<br>Transfer station | 站外换乘站<br>Transfer outside the station |               |               |               |                 |
| 飞机场<br>The Airport | 火车站<br>Railway Station |                                     |                         |                           |                                       |               |               |               |                 |

注：此图为变形的折线图，非实际走向

|                                                                 |   |   |   |    |    |
|-----------------------------------------------------------------|---|---|---|----|----|
| 暂未开通线路                                                          | 6 | 8 | 9 | 17 | 18 |
| 有轨电车蓉2号线清溪、西河段、新论路、天兴路、桐梓大道、普照四路、安泰二路、安泰五路、望丛中路、和兴街、波萝滩、柳安路暂未开通 |   |   |   |    |    |
